# Supplementary material
Source: Springer Nature journal article supplement (https://www.springermedizin.de/resource/supplementary/12916_2010_364_MOESM1_ESM.pdf/9599792)
Supplement: MOESM1 [file 9599792]

Peripartum Onset of  
**MUSCULOSKELETAL\* PELVIC PAIN**  
(1<sup>st</sup> trimester to 6 months postpartum)

**Exclude**

Rupture of Symphysis Pubis  
Bone / Joint Infections (osteomyelitis, tuberculosis, syphilis)  
Bone tumours (primary / metastatic)  
Lower Back Pain syndromes

**MEDICAL HISTORY**

Weight loss,  
Previous malignancies,  
Immunosuppression state,  
previous Trauma  
Fever / feeling systemically unwell  
thorough Pain history

**CLINICAL EXAMINATION**

(±) Focal inflammation signs  
(-) Neurological signs  
**Gait – Posture – Pelvic tilt**  
**Pain referral maps**  
(+) around symphysis pubis / sacroiliac joints / gluteal regions  
**Pain provocation tests**  
(-) SLR, Slump, Crams, Femoralis nerve test  
(+) P4, FABER, Gaenslen, LDL, ASLR, modified Trendelenburg  
Manual Distraction / Compression of Iliac blades  
**Clicking – Grinding sensation**

**IMAGING**

**MRI scan**  
**AP pelvis – Inlet / Outlet**  
**Flamingo views**  
(-) sequestration of bone  
(±) rarefaction of bone  
pubic symphysis gap or step

**LABORATORY TESTS**

Blood Tests  
Urine analysis

**GUIDED LOCAL ANESTHETIC INJECTION**

Noticeable pain-free  
Provocation tests

\* MUSCULOSKELETAL Pelvic Pain: Urological, Gynaecological, Gastrointestinal, Pelvic Visceral or Vascular pathologies, Obstetric complications have been excluded.
